# Supplementary material for: Meta-Analysis of HTLV-1-Infected Patients Identifies CD40LG and GBP2 as Markers of ATLL and HAM/TSP Clinical Status: Two Genes Beat as One
Source: Front Genet. 2019 Nov 8;10:1056. doi: 10.3389/fgene.2019.01056 (PMC6857459; doi:10.3389/fgene.2019.01056)
Supplement: Table S5 — Detailed information regarding the negatively correlated pathways and associated genes (ENTREZ ID). [file DataSheet_5.csv]

source	target	weight								source	target	weight
CD40LG	LOC401431	0.898245614035088								CD40LG	LOC401431	0.898245614035088
GBP2	TNFAIP6	0.898245614035088								GBP2	TNFAIP6	0.898245614035088
CD40LG	CD6	0.887719298245614								CD40LG	CD6	0.887719298245614
CD40LG	TCF3	0.887719298245614								CD40LG	TCF3	0.887719298245614
CD40LG	FUNDC1	0.885964912280702								CD40LG	FUNDC1	0.885964912280702
CD40LG	GIPC1	0.880701754385965								CD40LG	GIPC1	0.880701754385965
CD40LG	CD5	0.878947368421053								CD40LG	CD5	0.878947368421053
GBP2	IFITM1	0.878947368421053								GBP2	IFITM1	0.878947368421053
CD40LG	FLT3LG	0.870175438596491								CD40LG	FLT3LG	0.870175438596491
CD40LG	SUSD3	0.868421052631579								CD40LG	SUSD3	0.868421052631579
CD40LG	IKBKE	0.866666666666667								CD40LG	IKBKE	0.866666666666667
CD40LG	NOL6	0.864912280701754								CD40LG	NOL6	0.864912280701754
GBP2	NUCB1	0.863157894736842								GBP2	NUCB1	0.863157894736842
CD40LG	IL32	0.856140350877193								CD40LG	IL32	0.856140350877193
CD40LG	SLAMF1	0.854385964912281								CD40LG	SLAMF1	0.854385964912281
CD40LG	PAFAH1B3	0.852631578947368								CD40LG	PAFAH1B3	0.852631578947368
CD40LG	FBLN5	0.847368421052632								CD40LG	FBLN5	0.847368421052632
CD40LG	SLA2	0.847368421052632								CD40LG	SLA2	0.847368421052632
CD40LG	CNTNAP1	0.845614035087719								CD40LG	CNTNAP1	0.845614035087719
CD40LG	FANCL	0.845614035087719								CD40LG	FANCL	0.845614035087719
CD40LG	TATDN2	0.845614035087719								CD40LG	TATDN2	0.845614035087719
CD40LG	FBXO22	0.843859649122807								CD40LG	FBXO22	0.843859649122807
CD40LG	SLC2A4RG	0.843859649122807								CD40LG	SLC2A4RG	0.843859649122807
CD40LG	GPD1L	0.842105263157895								CD40LG	GPD1L	0.842105263157895
CD40LG	KBTBD4	0.842105263157895								CD40LG	KBTBD4	0.842105263157895
CD40LG	TMEM116	0.842105263157895								CD40LG	TMEM116	0.842105263157895
CD40LG	KCNK12	0.840350877192982								CD40LG	KCNK12	0.840350877192982
CD40LG	MORC2	0.840350877192982								CD40LG	MORC2	0.840350877192982
CD40LG	PHF19	0.840350877192982								CD40LG	PHF19	0.840350877192982
CD40LG	NBL1	0.83859649122807								CD40LG	NBL1	0.83859649122807
CD40LG	PDIK1L	0.83859649122807								CD40LG	PDIK1L	0.83859649122807
CD40LG	CSRP1	0.836842105263158								CD40LG	CSRP1	0.836842105263158
CD40LG	SIRT4	0.836842105263158								CD40LG	SIRT4	0.836842105263158
CD40LG	CLPP	0.835087719298246								CD40LG	CLPP	0.835087719298246
CD40LG	SPSB1	0.835087719298246								CD40LG	SPSB1	0.835087719298246
CD40LG	TXLNA	0.835087719298246								CD40LG	TXLNA	0.835087719298246
CD40LG	CD96	0.833333333333333								CD40LG	CD96	0.833333333333333
GBP2	IFIT3	0.833333333333333								GBP2	IFIT3	0.833333333333333
CD40LG	COMTD1	0.831578947368421								CD40LG	COMTD1	0.831578947368421
CD40LG	LAT	0.831578947368421								CD40LG	LAT	0.831578947368421
CD40LG	LBH	0.831578947368421								CD40LG	LBH	0.831578947368421
GBP2	PARP9	0.831578947368421								GBP2	PARP9	0.831578947368421
CD40LG	DNMT1	0.829824561403509								CD40LG	DNMT1	0.829824561403509
CD40LG	SELI	0.829824561403509								CD40LG	SELI	0.829824561403509
CD40LG	MAN1B1	0.828070175438597								CD40LG	MAN1B1	0.828070175438597
CD40LG	SLC25A25	0.828070175438597								CD40LG	SLC25A25	0.828070175438597
CD40LG	DDHD2	0.826315789473684								CD40LG	DDHD2	0.826315789473684
CD40LG	ZNF302	0.826315789473684								CD40LG	ZNF302	0.826315789473684
CD40LG	ITGB1	0.824561403508772								CD40LG	ITGB1	0.824561403508772
CD40LG	MOV10	0.824561403508772								CD40LG	MOV10	0.824561403508772
CD40LG	SLC35D2	0.821052631578947								CD40LG	SLC35D2	0.821052631578947
CD40LG	WWP1	0.821052631578947								CD40LG	WWP1	0.821052631578947
CD40LG	PFKL	0.819298245614035								CD40LG	PFKL	0.819298245614035
CD40LG	SLC7A6	0.819298245614035								CD40LG	SLC7A6	0.819298245614035
CD40LG	SPTAN1	0.819298245614035								CD40LG	SPTAN1	0.819298245614035
CD40LG	MLL	0.817543859649123								CD40LG	MLL	0.817543859649123
CD40LG	CDR2	0.815789473684211								CD40LG	CDR2	0.815789473684211
CD40LG	MAP4K1	0.815789473684211								CD40LG	MAP4K1	0.815789473684211
CD40LG	PLOD3	0.814035087719298								CD40LG	PLOD3	0.814035087719298
CD40LG	ST6GAL1	0.814035087719298								CD40LG	ST6GAL1	0.814035087719298
CD40LG	PPRC1	0.812280701754386								CD40LG	PPRC1	0.812280701754386
CD40LG	TMC6	0.812280701754386								CD40LG	TMC6	0.812280701754386
CD40LG	WDR7	0.812280701754386								CD40LG	WDR7	0.812280701754386
CD40LG	NUP205	0.810526315789474								CD40LG	NUP205	0.810526315789474
GBP2	LAMA3	0.808771929824561								GBP2	LAMA3	0.808771929824561
CD40LG	PI16	0.808771929824561								CD40LG	PI16	0.808771929824561
CD40LG	SEPW1	0.808771929824561								CD40LG	SEPW1	0.808771929824561
CD40LG	SFMBT1	0.808771929824561								CD40LG	SFMBT1	0.808771929824561
CD40LG	UBASH3A	0.808771929824561								CD40LG	UBASH3A	0.808771929824561
CD40LG	IL21R	0.807017543859649								CD40LG	IL21R	0.807017543859649
CD40LG	MINPP1	0.807017543859649								CD40LG	MINPP1	0.807017543859649
CD40LG	SBF1	0.807017543859649								CD40LG	SBF1	0.807017543859649
CD40LG	SLC35C1	0.807017543859649								CD40LG	SLC35C1	0.807017543859649
CD40LG	TRRAP	0.807017543859649								CD40LG	TRRAP	0.807017543859649
CD40LG	ITGB7	0.805263157894737								CD40LG	ITGB7	0.805263157894737
CD40LG	PAG1	0.805263157894737								CD40LG	PAG1	0.805263157894737
CD40LG	RAP1GDS1	0.805263157894737								CD40LG	RAP1GDS1	0.805263157894737
CD40LG	CDCA7	0.803508771929825								CD40LG	CDCA7	0.803508771929825
CD40LG	DDX31	0.803508771929825								CD40LG	DDX31	0.803508771929825
CD40LG	TBC1D2B	0.803508771929825								CD40LG	TBC1D2B	0.803508771929825
CD40LG	TMEM106B	0.803508771929825								CD40LG	TMEM106B	0.803508771929825
CD40LG	GIMAP5	0.801754385964912								CD40LG	GIMAP5	0.801754385964912
CD40LG	GNE	0.801754385964912								CD40LG	GNE	0.801754385964912
CD40LG	HAPLN3	0.801754385964912								CD40LG	HAPLN3	0.801754385964912
CD40LG	SEPHS1	0.801754385964912								CD40LG	SEPHS1	0.801754385964912
CD40LG	SNTA1	0.801754385964912								CD40LG	SNTA1	0.801754385964912
CD40LG	TRIB2	0.801754385964912								CD40LG	TRIB2	0.801754385964912
CD40LG	LARS	0.8								CD40LG	LARS	0.8
CD40LG	PPP1R3F	0.8								CD40LG	PPP1R3F	0.8
CD40LG	SCMH1	0.8								CD40LG	SCMH1	0.8
GBP2	SLC16A3	0.8								GBP2	SLC16A3	0.8
CD40LG	SMYD2	0.8								CD40LG	SMYD2	0.8
CD40LG	PTPRCAP	0.798245614035088								CD40LG	PTPRCAP	0.798245614035088
CD40LG	ZNF235	0.798245614035088								CD40LG	ZNF235	0.798245614035088
CD40LG	ILF3	0.796491228070175								CD40LG	ILF3	0.796491228070175
GBP2	STAT1	0.796491228070175								GBP2	STAT1	0.796491228070175
CD40LG	GIMAP7	0.794736842105263								CD40LG	GIMAP7	0.794736842105263
CD40LG	ILVBL	0.794736842105263								CD40LG	ILVBL	0.794736842105263
CD40LG	MCPH1	0.794736842105263								CD40LG	MCPH1	0.794736842105263
CD40LG	ZNF593	0.794736842105263								CD40LG	ZNF593	0.794736842105263
CD40LG	CSE1L	0.792982456140351								CD40LG	CSE1L	0.792982456140351
GBP2	PSTPIP2	0.792982456140351								GBP2	PSTPIP2	0.792982456140351
CD40LG	ITK	0.791228070175439								CD40LG	ITK	0.791228070175439
CD40LG	NAP1L4	0.791228070175439								CD40LG	NAP1L4	0.791228070175439
CD40LG	CLSTN1	0.789473684210526								CD40LG	CLSTN1	0.789473684210526
CD40LG	GRAP	0.789473684210526								CD40LG	GRAP	0.789473684210526
CD40LG	MYO9A	0.789473684210526								CD40LG	MYO9A	0.789473684210526
CD40LG	NMT1	0.789473684210526								CD40LG	NMT1	0.789473684210526
CD40LG	SETD1A	0.789473684210526								CD40LG	SETD1A	0.789473684210526
CD40LG	FBXO31	0.787719298245614								CD40LG	FBXO31	0.787719298245614
CD40LG	POMGNT1	0.787719298245614								CD40LG	POMGNT1	0.787719298245614
CD40LG	ST6GALNAC6	0.787719298245614								CD40LG	ST6GALNAC6	0.787719298245614
CD40LG	TYSND1	0.787719298245614								CD40LG	TYSND1	0.787719298245614
CD40LG	CRIP1	0.785964912280702								CD40LG	CRIP1	0.785964912280702
CD40LG	EIF2S1	0.785964912280702								CD40LG	EIF2S1	0.785964912280702
CD40LG	LEF1	0.785964912280702								CD40LG	LEF1	0.785964912280702
CD40LG	PSMA5	0.785964912280702								CD40LG	PSMA5	0.785964912280702
CD40LG	DCUN1D4	0.784210526315789								CD40LG	DCUN1D4	0.784210526315789
CD40LG	LOC389641	0.784210526315789								CD40LG	LOC389641	0.784210526315789
CD40LG	OR2A9P	0.784210526315789								CD40LG	OR2A9P	0.784210526315789
CD40LG	SGPP2	0.784210526315789								CD40LG	SGPP2	0.784210526315789
CD40LG	GOT2	0.782456140350877								CD40LG	GOT2	0.782456140350877
GBP2	IFITM3	0.782456140350877								GBP2	IFITM3	0.782456140350877
CD40LG	FBXL16	0.780701754385965								CD40LG	FBXL16	0.780701754385965
CD40LG	PITPNB	0.780701754385965								CD40LG	PITPNB	0.780701754385965
CD40LG	PRDX4	0.780701754385965								CD40LG	PRDX4	0.780701754385965
GBP2	UBE2L6	0.780701754385965								GBP2	UBE2L6	0.780701754385965
CD40LG	CHCHD4	0.778947368421053								CD40LG	CHCHD4	0.778947368421053
CD40LG	REXO4	0.778947368421053								CD40LG	REXO4	0.778947368421053
CD40LG	SLC25A15	0.778947368421053								CD40LG	SLC25A15	0.778947368421053
CD40LG	DGKA	0.77719298245614								CD40LG	DGKA	0.77719298245614
CD40LG	FBXO21	0.77719298245614								CD40LG	FBXO21	0.77719298245614
CD40LG	FUK	0.77719298245614								CD40LG	FUK	0.77719298245614
CD40LG	GNL1	0.77719298245614								CD40LG	GNL1	0.77719298245614
CD40LG	HEATR1	0.77719298245614								CD40LG	HEATR1	0.77719298245614
CD40LG	MTO1	0.77719298245614								CD40LG	MTO1	0.77719298245614
GBP2	SERPING1	0.77719298245614								GBP2	SERPING1	0.77719298245614
CD40LG	EHBP1	0.775438596491228								CD40LG	EHBP1	0.775438596491228
CD40LG	EXOC2	0.775438596491228								CD40LG	EXOC2	0.775438596491228
CD40LG	INCENP	0.775438596491228								CD40LG	INCENP	0.775438596491228
CD40LG	KIAA0564	0.775438596491228								CD40LG	KIAA0564	0.775438596491228
CD40LG	DDX10	0.773684210526316								CD40LG	DDX10	0.773684210526316
CD40LG	CD7	0.771929824561403								CD40LG	CD7	0.771929824561403
CD40LG	MFGE8	0.771929824561403								CD40LG	MFGE8	0.771929824561403
CD40LG	SCAMP3	0.771929824561403								CD40LG	SCAMP3	0.771929824561403
CD40LG	STK39	0.771929824561403								CD40LG	STK39	0.771929824561403
CD40LG	TNFRSF25	0.771929824561403								CD40LG	TNFRSF25	0.771929824561403
CD40LG	FAM38A	0.770175438596491								CD40LG	FAM38A	0.770175438596491
CD40LG	PLSCR3	0.770175438596491								CD40LG	PLSCR3	0.770175438596491
CD40LG	RNPEPL1	0.770175438596491								CD40LG	RNPEPL1	0.770175438596491
CD40LG	ZNF146	0.770175438596491								CD40LG	ZNF146	0.770175438596491
CD40LG	FTSJ1	0.768421052631579								CD40LG	FTSJ1	0.768421052631579
CD40LG	USP7	0.768421052631579								CD40LG	USP7	0.768421052631579
CD40LG	ITPA	0.766666666666667								CD40LG	ITPA	0.766666666666667
CD40LG	MGC57346	0.766666666666667								CD40LG	MGC57346	0.766666666666667
CD40LG	MTHFD1	0.766666666666667								CD40LG	MTHFD1	0.766666666666667
CD40LG	ZFP161	0.766666666666667								CD40LG	ZFP161	0.766666666666667
CD40LG	COQ10A	0.764912280701754								CD40LG	COQ10A	0.764912280701754
CD40LG	DNAJC9	0.764912280701754								CD40LG	DNAJC9	0.764912280701754
CD40LG	FAM102A	0.764912280701754								CD40LG	FAM102A	0.764912280701754
CD40LG	FASN	0.764912280701754								CD40LG	FASN	0.764912280701754
CD40LG	GALM	0.764912280701754								CD40LG	GALM	0.764912280701754
CD40LG	LIG1	0.764912280701754								CD40LG	LIG1	0.764912280701754
CD40LG	XPO4	0.764912280701754								CD40LG	XPO4	0.764912280701754
CD40LG	ZBTB24	0.764912280701754								CD40LG	ZBTB24	0.764912280701754
CD40LG	GIMAP6	0.763157894736842								CD40LG	GIMAP6	0.763157894736842
CD40LG	NEK1	0.763157894736842								CD40LG	NEK1	0.763157894736842
CD40LG	ZNF570	0.763157894736842								CD40LG	ZNF570	0.763157894736842
CD40LG	KIAA0586	0.76140350877193								CD40LG	KIAA0586	0.76140350877193
CD40LG	NELF	0.76140350877193								CD40LG	NELF	0.76140350877193
CD40LG	PDCD5	0.76140350877193								CD40LG	PDCD5	0.76140350877193
CD40LG	SLC25A22	0.76140350877193								CD40LG	SLC25A22	0.76140350877193
CD40LG	TDRD3	0.76140350877193								CD40LG	TDRD3	0.76140350877193
CD40LG	CIRH1A	0.759649122807018								CD40LG	CIRH1A	0.759649122807018
CD40LG	CSTF3	0.759649122807018								CD40LG	CSTF3	0.759649122807018
CD40LG	DDX46	0.759649122807018								CD40LG	DDX46	0.759649122807018
CD40LG	ODF2	0.759649122807018								CD40LG	ODF2	0.759649122807018
CD40LG	PPP1R16B	0.759649122807018								CD40LG	PPP1R16B	0.759649122807018
CD40LG	SKIV2L2	0.759649122807018								CD40LG	SKIV2L2	0.759649122807018
CD40LG	SMAD3	0.759649122807018								CD40LG	SMAD3	0.759649122807018
CD40LG	FAM84B	0.757894736842105								CD40LG	FAM84B	0.757894736842105
CD40LG	HERC1	0.757894736842105								CD40LG	HERC1	0.757894736842105
CD40LG	MELK	0.757894736842105								CD40LG	MELK	0.757894736842105
CD40LG	PREP	0.757894736842105								CD40LG	PREP	0.757894736842105
CD40LG	NMT2	0.756140350877193								CD40LG	NMT2	0.756140350877193
CD40LG	NOSIP	0.756140350877193								CD40LG	NOSIP	0.756140350877193
CD40LG	ZNF444	0.756140350877193								CD40LG	ZNF444	0.756140350877193
CD40LG	ZNF544	0.756140350877193								CD40LG	ZNF544	0.756140350877193
CD40LG	ECHS1	0.754385964912281								CD40LG	ECHS1	0.754385964912281
CD40LG	NAP1L1	0.754385964912281								CD40LG	NAP1L1	0.754385964912281
CD40LG	SARM1	0.754385964912281								CD40LG	SARM1	0.754385964912281
GBP2	TNFSF10	0.754385964912281								GBP2	TNFSF10	0.754385964912281
CD40LG	DOCK10	0.752631578947368								CD40LG	DOCK10	0.752631578947368
CD40LG	KLF12	0.752631578947368								CD40LG	KLF12	0.752631578947368
CD40LG	NVL	0.752631578947368								CD40LG	NVL	0.752631578947368
CD40LG	STUB1	0.752631578947368								CD40LG	STUB1	0.752631578947368
CD40LG	ZNF548	0.752631578947368								CD40LG	ZNF548	0.752631578947368
CD40LG	EVL	0.750877192982456								CD40LG	EVL	0.750877192982456
CD40LG	GIT1	0.750877192982456								CD40LG	GIT1	0.750877192982456
CD40LG	KLHDC5	0.750877192982456								CD40LG	KLHDC5	0.750877192982456
CD40LG	LOC388564	0.750877192982456								CD40LG	LOC388564	0.750877192982456
CD40LG	RABEP1	0.750877192982456								CD40LG	RABEP1	0.750877192982456
CD40LG	CEBPG	0.749122807017544								CD40LG	CEBPG	0.749122807017544
CD40LG	COPB2	0.749122807017544								CD40LG	COPB2	0.749122807017544
CD40LG	ELP3	0.749122807017544								CD40LG	ELP3	0.749122807017544
CD40LG	PHF14	0.749122807017544								CD40LG	PHF14	0.749122807017544
CD40LG	USP5	0.749122807017544								CD40LG	USP5	0.749122807017544
CD40LG	GOLGA4	0.747368421052632								CD40LG	GOLGA4	0.747368421052632
CD40LG	NUDT21	0.747368421052632								CD40LG	NUDT21	0.747368421052632
CD40LG	PHC1	0.747368421052632								CD40LG	PHC1	0.747368421052632
CD40LG	ZAP70	0.747368421052632								CD40LG	ZAP70	0.747368421052632
CD40LG	DDX18	0.745614035087719								CD40LG	DDX18	0.745614035087719
CD40LG	LSG1	0.745614035087719								CD40LG	LSG1	0.745614035087719
CD40LG	MFSD5	0.745614035087719								CD40LG	MFSD5	0.745614035087719
CD40LG	MTX3	0.745614035087719								CD40LG	MTX3	0.745614035087719
CD40LG	SF3B3	0.745614035087719								CD40LG	SF3B3	0.745614035087719
CD40LG	EMG1	0.743859649122807								CD40LG	EMG1	0.743859649122807
GBP2	PLSCR1	0.743859649122807								GBP2	PLSCR1	0.743859649122807
CD40LG	SNAPC3	0.743859649122807								CD40LG	SNAPC3	0.743859649122807
CD40LG	CSNK2A2	0.742105263157895								CD40LG	CSNK2A2	0.742105263157895
CD40LG	EPHA1	0.742105263157895								CD40LG	EPHA1	0.742105263157895
CD40LG	NUCB2	0.742105263157895								CD40LG	NUCB2	0.742105263157895
CD40LG	PEX14	0.742105263157895								CD40LG	PEX14	0.742105263157895
CD40LG	RIMS3	0.742105263157895								CD40LG	RIMS3	0.742105263157895
CD40LG	SURF4	0.742105263157895								CD40LG	SURF4	0.742105263157895
CD40LG	CDC25B	0.740350877192982								CD40LG	CDC25B	0.740350877192982
CD40LG	MYO1C	0.740350877192982								CD40LG	MYO1C	0.740350877192982
CD40LG	ZNF512	0.740350877192982								CD40LG	ZNF512	0.740350877192982
CD40LG	GCDH	0.73859649122807								CD40LG	GCDH	0.73859649122807
CD40LG	LCK	0.73859649122807								CD40LG	LCK	0.73859649122807
CD40LG	PPIL1	0.73859649122807								CD40LG	PPIL1	0.73859649122807
CD40LG	TERF2IP	0.73859649122807								CD40LG	TERF2IP	0.73859649122807
CD40LG	ZFX	0.73859649122807								CD40LG	ZFX	0.73859649122807
CD40LG	EML4	0.736842105263158								CD40LG	EML4	0.736842105263158
CD40LG	GALT	0.736842105263158								CD40LG	GALT	0.736842105263158
CD40LG	HCFC1	0.736842105263158								CD40LG	HCFC1	0.736842105263158
CD40LG	LCMT1	0.736842105263158								CD40LG	LCMT1	0.736842105263158
CD40LG	UBE2L3	0.736842105263158								CD40LG	UBE2L3	0.736842105263158
CD40LG	XBP1	0.736842105263158								CD40LG	XBP1	0.736842105263158
CD40LG	NET1	0.735087719298246								CD40LG	NET1	0.735087719298246
CD40LG	SALL2	0.735087719298246								CD40LG	SALL2	0.735087719298246
CD40LG	SLAMF6	0.735087719298246								CD40LG	SLAMF6	0.735087719298246
CD40LG	TAF1B	0.735087719298246								CD40LG	TAF1B	0.735087719298246
CD40LG	TBCD	0.735087719298246								CD40LG	TBCD	0.735087719298246
CD40LG	TBRG4	0.735087719298246								CD40LG	TBRG4	0.735087719298246
CD40LG	WDR60	0.735087719298246								CD40LG	WDR60	0.735087719298246
CD40LG	NUP210	0.733333333333333								CD40LG	NUP210	0.733333333333333
CD40LG	PRKCQ	0.733333333333333								CD40LG	PRKCQ	0.733333333333333
CD40LG	SELM	0.733333333333333								CD40LG	SELM	0.733333333333333
CD40LG	SLC38A1	0.733333333333333								CD40LG	SLC38A1	0.733333333333333
CD40LG	ZC3H15	0.733333333333333								CD40LG	ZC3H15	0.733333333333333
CD40LG	ZNF142	0.733333333333333								CD40LG	ZNF142	0.733333333333333
CD40LG	KIF5C	0.731578947368421								CD40LG	KIF5C	0.731578947368421
CD40LG	STAT4	0.731578947368421								CD40LG	STAT4	0.731578947368421
GBP2	ZNF469	0.731578947368421								GBP2	ZNF469	0.731578947368421
CD40LG	PIAS3	0.729824561403509								CD40LG	PIAS3	0.729824561403509
CD40LG	SLC9A9	0.729824561403509								CD40LG	SLC9A9	0.729824561403509
CD40LG	TMEM14A	0.729824561403509								CD40LG	TMEM14A	0.729824561403509
CD40LG	ZNF480	0.729824561403509								CD40LG	ZNF480	0.729824561403509
CD40LG	CXCR3	0.728070175438597								CD40LG	CXCR3	0.728070175438597
CD40LG	DCP1B	0.728070175438597								CD40LG	DCP1B	0.728070175438597
CD40LG	DYNC1I2	0.728070175438597								CD40LG	DYNC1I2	0.728070175438597
CD40LG	FMNL3	0.728070175438597								CD40LG	FMNL3	0.728070175438597
CD40LG	LMNB2	0.728070175438597								CD40LG	LMNB2	0.728070175438597
CD40LG	PCSK7	0.728070175438597								CD40LG	PCSK7	0.728070175438597
CD40LG	RBM14	0.728070175438597								CD40LG	RBM14	0.728070175438597
GBP2	SP110	0.728070175438597								GBP2	SP110	0.728070175438597
CD40LG	TTL	0.728070175438597								CD40LG	TTL	0.728070175438597
CD40LG	EPRS	0.726315789473684								CD40LG	EPRS	0.726315789473684
GBP2	IFIT2	0.726315789473684								GBP2	IFIT2	0.726315789473684
GBP2	KCNJ15	0.726315789473684								GBP2	KCNJ15	0.726315789473684
CD40LG	KDELC2	0.726315789473684								CD40LG	KDELC2	0.726315789473684
CD40LG	LRBA	0.726315789473684								CD40LG	LRBA	0.726315789473684
CD40LG	NUP155	0.726315789473684								CD40LG	NUP155	0.726315789473684
CD40LG	RQCD1	0.726315789473684								CD40LG	RQCD1	0.726315789473684
CD40LG	SBDS	0.726315789473684								CD40LG	SBDS	0.726315789473684
CD40LG	SLC37A4	0.726315789473684								CD40LG	SLC37A4	0.726315789473684
CD40LG	VAC14	0.726315789473684								CD40LG	VAC14	0.726315789473684
CD40LG	ZNF202	0.726315789473684								CD40LG	ZNF202	0.726315789473684
CD40LG	COPZ1	0.724561403508772								CD40LG	COPZ1	0.724561403508772
CD40LG	GATA3	0.724561403508772								CD40LG	GATA3	0.724561403508772
CD40LG	MPP5	0.724561403508772								CD40LG	MPP5	0.724561403508772
CD40LG	MRPL52	0.724561403508772								CD40LG	MRPL52	0.724561403508772
CD40LG	CHCHD6	0.72280701754386								CD40LG	CHCHD6	0.72280701754386
GBP2	SIRPB1	0.72280701754386								GBP2	SIRPB1	0.72280701754386
CD40LG	SNURF	0.72280701754386								CD40LG	SNURF	0.72280701754386
CD40LG	TRAP1	0.72280701754386								CD40LG	TRAP1	0.72280701754386
CD40LG	CHPF	0.721052631578947								CD40LG	CHPF	0.721052631578947
CD40LG	GCNT2	0.721052631578947								CD40LG	GCNT2	0.721052631578947
CD40LG	HEATR5B	0.721052631578947								CD40LG	HEATR5B	0.721052631578947
CD40LG	MCM6	0.721052631578947								CD40LG	MCM6	0.721052631578947
GBP2	MSRA	0.721052631578947								GBP2	MSRA	0.721052631578947
CD40LG	MYO1G	0.721052631578947								CD40LG	MYO1G	0.721052631578947
CD40LG	PNRC2	0.721052631578947								CD40LG	PNRC2	0.721052631578947
CD40LG	TMED9	0.721052631578947								CD40LG	TMED9	0.721052631578947
CD40LG	CENPM	0.719298245614035								CD40LG	CENPM	0.719298245614035
CD40LG	GLS	0.719298245614035								CD40LG	GLS	0.719298245614035
CD40LG	IL7R	0.719298245614035								CD40LG	IL7R	0.719298245614035
CD40LG	KIAA1826	0.719298245614035								CD40LG	KIAA1826	0.719298245614035
CD40LG	STK25	0.719298245614035								CD40LG	STK25	0.719298245614035
CD40LG	TRAPPC2	0.719298245614035								CD40LG	TRAPPC2	0.719298245614035
CD40LG	TRIM35	0.719298245614035								CD40LG	TRIM35	0.719298245614035
CD40LG	DEXI	0.717543859649123								CD40LG	DEXI	0.717543859649123
CD40LG	FAM113B	0.717543859649123								CD40LG	FAM113B	0.717543859649123
CD40LG	FLAD1	0.717543859649123								CD40LG	FLAD1	0.717543859649123
CD40LG	NASP	0.717543859649123								CD40LG	NASP	0.717543859649123
CD40LG	NCOA7	0.717543859649123								CD40LG	NCOA7	0.717543859649123
CD40LG	PI4K2B	0.717543859649123								CD40LG	PI4K2B	0.717543859649123
CD40LG	PRKCH	0.717543859649123								CD40LG	PRKCH	0.717543859649123
CD40LG	PRKX	0.717543859649123								CD40LG	PRKX	0.717543859649123
CD40LG	MRPL14	0.715789473684211								CD40LG	MRPL14	0.715789473684211
CD40LG	RASGRP1	0.715789473684211								CD40LG	RASGRP1	0.715789473684211
CD40LG	RLTPR	0.715789473684211								CD40LG	RLTPR	0.715789473684211
CD40LG	RPS4X	0.715789473684211								CD40LG	RPS4X	0.715789473684211
GBP2	STAT2	0.715789473684211								GBP2	STAT2	0.715789473684211
CD40LG	SYMPK	0.715789473684211								CD40LG	SYMPK	0.715789473684211
CD40LG	CDK5	0.714035087719298								CD40LG	CDK5	0.714035087719298
CD40LG	GPS1	0.714035087719298								CD40LG	GPS1	0.714035087719298
CD40LG	KIAA0922	0.714035087719298								CD40LG	KIAA0922	0.714035087719298
CD40LG	MAP2K5	0.714035087719298								CD40LG	MAP2K5	0.714035087719298
CD40LG	REXO2	0.714035087719298								CD40LG	REXO2	0.714035087719298
CD40LG	SIT1	0.714035087719298								CD40LG	SIT1	0.714035087719298
CD40LG	WDR18	0.714035087719298								CD40LG	WDR18	0.714035087719298
CD40LG	EEF2K	0.712280701754386								CD40LG	EEF2K	0.712280701754386
GBP2	GNG8	0.712280701754386								GBP2	GNG8	0.712280701754386
GBP2	H3F3A	0.712280701754386								GBP2	H3F3A	0.712280701754386
CD40LG	MUM1	0.712280701754386								CD40LG	MUM1	0.712280701754386
CD40LG	PFDN1	0.712280701754386								CD40LG	PFDN1	0.712280701754386
CD40LG	PRC1	0.712280701754386								CD40LG	PRC1	0.712280701754386
CD40LG	SLC25A12	0.712280701754386								CD40LG	SLC25A12	0.712280701754386
CD40LG	TOP2B	0.712280701754386								CD40LG	TOP2B	0.712280701754386
CD40LG	ZBTB4	0.712280701754386								CD40LG	ZBTB4	0.712280701754386
CD40LG	GCET2	0.710526315789474								CD40LG	GCET2	0.710526315789474
CD40LG	GMNN	0.710526315789474								CD40LG	GMNN	0.710526315789474
CD40LG	IAH1	0.710526315789474								CD40LG	IAH1	0.710526315789474
CD40LG	LRFN3	0.710526315789474								CD40LG	LRFN3	0.710526315789474
CD40LG	PFKP	0.710526315789474								CD40LG	PFKP	0.710526315789474
CD40LG	PLAGL2	0.710526315789474								CD40LG	PLAGL2	0.710526315789474
CD40LG	POLR1C	0.710526315789474								CD40LG	POLR1C	0.710526315789474
CD40LG	SLC25A42	0.710526315789474								CD40LG	SLC25A42	0.710526315789474
CD40LG	SLC4A2	0.710526315789474								CD40LG	SLC4A2	0.710526315789474
CD40LG	ZNF77	0.710526315789474								CD40LG	ZNF77	0.710526315789474
CD40LG	DDX1	0.708771929824561								CD40LG	DDX1	0.708771929824561
CD40LG	HSPA5	0.708771929824561								CD40LG	HSPA5	0.708771929824561
CD40LG	IL2RB	0.708771929824561								CD40LG	IL2RB	0.708771929824561
CD40LG	MEN1	0.708771929824561								CD40LG	MEN1	0.708771929824561
CD40LG	METT5D1	0.708771929824561								CD40LG	METT5D1	0.708771929824561
CD40LG	RALA	0.708771929824561								CD40LG	RALA	0.708771929824561
CD40LG	RRM1	0.708771929824561								CD40LG	RRM1	0.708771929824561
CD40LG	SLC27A5	0.708771929824561								CD40LG	SLC27A5	0.708771929824561
CD40LG	TRIM65	0.708771929824561								CD40LG	TRIM65	0.708771929824561
CD40LG	ZNF23	0.708771929824561								CD40LG	ZNF23	0.708771929824561
CD40LG	CDC20	0.707017543859649								CD40LG	CDC20	0.707017543859649
CD40LG	DOCK9	0.707017543859649								CD40LG	DOCK9	0.707017543859649
CD40LG	PWP1	0.707017543859649								CD40LG	PWP1	0.707017543859649
CD40LG	RANGAP1	0.707017543859649								CD40LG	RANGAP1	0.707017543859649
GBP2	SLC40A1	0.707017543859649								GBP2	SLC40A1	0.707017543859649
CD40LG	CD47	0.705263157894737								CD40LG	CD47	0.705263157894737
CD40LG	CDC14A	0.705263157894737								CD40LG	CDC14A	0.705263157894737
CD40LG	CORO2A	0.705263157894737								CD40LG	CORO2A	0.705263157894737
CD40LG	OAS2	0.705263157894737								CD40LG	OAS2	0.705263157894737
CD40LG	OCIAD2	0.705263157894737								CD40LG	OCIAD2	0.705263157894737
CD40LG	PPIH	0.705263157894737								CD40LG	PPIH	0.705263157894737
CD40LG	RASSF7	0.705263157894737								CD40LG	RASSF7	0.705263157894737
CD40LG	SLC4A7	0.705263157894737								CD40LG	SLC4A7	0.705263157894737
CD40LG	TM2D2	0.705263157894737								CD40LG	TM2D2	0.705263157894737
CD40LG	TRAT1	0.705263157894737								CD40LG	TRAT1	0.705263157894737
CD40LG	CDK2AP2	0.703508771929825								CD40LG	CDK2AP2	0.703508771929825
CD40LG	CSPP1	0.703508771929825								CD40LG	CSPP1	0.703508771929825
CD40LG	DCI	0.703508771929825								CD40LG	DCI	0.703508771929825
CD40LG	DSTN	0.703508771929825								CD40LG	DSTN	0.703508771929825
CD40LG	FAM58A	0.703508771929825								CD40LG	FAM58A	0.703508771929825
CD40LG	FEN1	0.703508771929825								CD40LG	FEN1	0.703508771929825
CD40LG	IARS2	0.703508771929825								CD40LG	IARS2	0.703508771929825
CD40LG	LRRC8D	0.703508771929825								CD40LG	LRRC8D	0.703508771929825
CD40LG	MDN1	0.703508771929825								CD40LG	MDN1	0.703508771929825
CD40LG	MRPS12	0.703508771929825								CD40LG	MRPS12	0.703508771929825
CD40LG	NUDCD2	0.703508771929825								CD40LG	NUDCD2	0.703508771929825
CD40LG	PPAP2A	0.703508771929825								CD40LG	PPAP2A	0.703508771929825
CD40LG	PRDX1	0.703508771929825								CD40LG	PRDX1	0.703508771929825
CD40LG	TTF1	0.703508771929825								CD40LG	TTF1	0.703508771929825
CD40LG	CDK5RAP1	0.701754385964912								CD40LG	CDK5RAP1	0.701754385964912
CD40LG	LPIN1	0.701754385964912								CD40LG	LPIN1	0.701754385964912
CD40LG	NFATC1	0.701754385964912								CD40LG	NFATC1	0.701754385964912
CD40LG	NOC3L	0.701754385964912								CD40LG	NOC3L	0.701754385964912
CD40LG	PJA1	0.701754385964912								CD40LG	PJA1	0.701754385964912
GBP2	PNKD	0.701754385964912								GBP2	PNKD	0.701754385964912
CD40LG	RNASEN	0.701754385964912								CD40LG	RNASEN	0.701754385964912
CD40LG	RPL10L	0.701754385964912								CD40LG	RPL10L	0.701754385964912
CD40LG	RSL1D1	0.701754385964912								CD40LG	RSL1D1	0.701754385964912
CD40LG	SH3PXD2A	0.701754385964912								CD40LG	SH3PXD2A	0.701754385964912
CD40LG	VRK1	0.701754385964912								CD40LG	VRK1	0.701754385964912
GBP2	ZNF438	0.701754385964912								GBP2	ZNF438	0.701754385964912
GBP2	GGA2	-0.701754385964912								GBP2	GGA2	-0.701754385964912
GBP2	IBTK	-0.701754385964912								GBP2	IBTK	-0.701754385964912
GBP2	KNTC1	-0.701754385964912								GBP2	KNTC1	-0.701754385964912
CD40LG	MAPK1	-0.701754385964912								CD40LG	MAPK1	-0.701754385964912
CD40LG	MYADM	-0.701754385964912								CD40LG	MYADM	-0.701754385964912
CD40LG	P2RX1	-0.701754385964912								CD40LG	P2RX1	-0.701754385964912
GBP2	PIAS4	-0.701754385964912								GBP2	PIAS4	-0.701754385964912
GBP2	PPP1R13B	-0.701754385964912								GBP2	PPP1R13B	-0.701754385964912
CD40LG	PRAM1	-0.701754385964912								CD40LG	PRAM1	-0.701754385964912
GBP2	RBM12B	-0.701754385964912								GBP2	RBM12B	-0.701754385964912
GBP2	RHOT2	-0.701754385964912								GBP2	RHOT2	-0.701754385964912
GBP2	SMARCAD1	-0.701754385964912								GBP2	SMARCAD1	-0.701754385964912
CD40LG	SOD2	-0.701754385964912								CD40LG	SOD2	-0.701754385964912
GBP2	SPATA13	-0.701754385964912								GBP2	SPATA13	-0.701754385964912
CD40LG	FCGRT	-0.703508771929825								CD40LG	FCGRT	-0.703508771929825
GBP2	GOLGA8A	-0.703508771929825								GBP2	GOLGA8A	-0.703508771929825
GBP2	GOLT1B	-0.703508771929825								GBP2	GOLT1B	-0.703508771929825
GBP2	MSTO1	-0.703508771929825								GBP2	MSTO1	-0.703508771929825
GBP2	PFAS	-0.703508771929825								GBP2	PFAS	-0.703508771929825
CD40LG	RAB31	-0.703508771929825								CD40LG	RAB31	-0.703508771929825
CD40LG	RAB32	-0.703508771929825								CD40LG	RAB32	-0.703508771929825
GBP2	ZNF485	-0.703508771929825								GBP2	ZNF485	-0.703508771929825
GBP2	MLH1	-0.705263157894737								GBP2	MLH1	-0.705263157894737
CD40LG	SIPA1L2	-0.705263157894737								CD40LG	SIPA1L2	-0.705263157894737
CD40LG	SLC43A2	-0.705263157894737								CD40LG	SLC43A2	-0.705263157894737
GBP2	SYNJ2BP	-0.705263157894737								GBP2	SYNJ2BP	-0.705263157894737
CD40LG	CSNK1D	-0.707017543859649								CD40LG	CSNK1D	-0.707017543859649
GBP2	IPO9	-0.707017543859649								GBP2	IPO9	-0.707017543859649
GBP2	LTV1	-0.707017543859649								GBP2	LTV1	-0.707017543859649
GBP2	MGAT4A	-0.707017543859649								GBP2	MGAT4A	-0.707017543859649
CD40LG	MTX1	-0.707017543859649								CD40LG	MTX1	-0.707017543859649
CD40LG	PPP4R1	-0.707017543859649								CD40LG	PPP4R1	-0.707017543859649
GBP2	PWP1	-0.707017543859649								GBP2	PWP1	-0.707017543859649
GBP2	RER1	-0.707017543859649								GBP2	RER1	-0.707017543859649
GBP2	SP4	-0.707017543859649								GBP2	SP4	-0.707017543859649
GBP2	TDG	-0.707017543859649								GBP2	TDG	-0.707017543859649
GBP2	IMMT	-0.708771929824561								GBP2	IMMT	-0.708771929824561
GBP2	NMB	-0.708771929824561								GBP2	NMB	-0.708771929824561
CD40LG	PLAGL1	-0.708771929824561								CD40LG	PLAGL1	-0.708771929824561
GBP2	PLEKHG4	-0.708771929824561								GBP2	PLEKHG4	-0.708771929824561
GBP2	PRKRIR	-0.708771929824561								GBP2	PRKRIR	-0.708771929824561
GBP2	TOB1	-0.708771929824561								GBP2	TOB1	-0.708771929824561
CD40LG	ELL	-0.710526315789474								CD40LG	ELL	-0.710526315789474
GBP2	HPS4	-0.710526315789474								GBP2	HPS4	-0.710526315789474
GBP2	KIAA0391	-0.710526315789474								GBP2	KIAA0391	-0.710526315789474
CD40LG	LITAF	-0.710526315789474								CD40LG	LITAF	-0.710526315789474
CD40LG	MSRB2	-0.710526315789474								CD40LG	MSRB2	-0.710526315789474
CD40LG	PTAFR	-0.710526315789474								CD40LG	PTAFR	-0.710526315789474
GBP2	S100PBP	-0.710526315789474								GBP2	S100PBP	-0.710526315789474
GBP2	TJP3	-0.710526315789474								GBP2	TJP3	-0.710526315789474
GBP2	TMEM134	-0.710526315789474								GBP2	TMEM134	-0.710526315789474
CD40LG	ZBTB34	-0.710526315789474								CD40LG	ZBTB34	-0.710526315789474
GBP2	GOLGA1	-0.712280701754386								GBP2	GOLGA1	-0.712280701754386
GBP2	HSF2	-0.712280701754386								GBP2	HSF2	-0.712280701754386
GBP2	MRPS18B	-0.712280701754386								GBP2	MRPS18B	-0.712280701754386
GBP2	PDE8B	-0.712280701754386								GBP2	PDE8B	-0.712280701754386
GBP2	RAI1	-0.712280701754386								GBP2	RAI1	-0.712280701754386
GBP2	STAMBPL1	-0.712280701754386								GBP2	STAMBPL1	-0.712280701754386
GBP2	SUZ12	-0.712280701754386								GBP2	SUZ12	-0.712280701754386
GBP2	TOMM40	-0.712280701754386								GBP2	TOMM40	-0.712280701754386
GBP2	TTC19	-0.712280701754386								GBP2	TTC19	-0.712280701754386
GBP2	U2AF2	-0.712280701754386								GBP2	U2AF2	-0.712280701754386
GBP2	ZNF74	-0.712280701754386								GBP2	ZNF74	-0.712280701754386
CD40LG	IER3	-0.714035087719298								CD40LG	IER3	-0.714035087719298
GBP2	NIF3L1	-0.714035087719298								GBP2	NIF3L1	-0.714035087719298
GBP2	PEX5	-0.714035087719298								GBP2	PEX5	-0.714035087719298
CD40LG	PGD	-0.714035087719298								CD40LG	PGD	-0.714035087719298
GBP2	PRPSAP2	-0.714035087719298								GBP2	PRPSAP2	-0.714035087719298
GBP2	TARBP1	-0.714035087719298								GBP2	TARBP1	-0.714035087719298
CD40LG	CLEC4D	-0.715789473684211								CD40LG	CLEC4D	-0.715789473684211
GBP2	KIAA0907	-0.715789473684211								GBP2	KIAA0907	-0.715789473684211
GBP2	LRRC57	-0.715789473684211								GBP2	LRRC57	-0.715789473684211
CD40LG	NCF2	-0.715789473684211								CD40LG	NCF2	-0.715789473684211
GBP2	NKRF	-0.715789473684211								GBP2	NKRF	-0.715789473684211
CD40LG	NSMAF	-0.715789473684211								CD40LG	NSMAF	-0.715789473684211
GBP2	POP5	-0.715789473684211								GBP2	POP5	-0.715789473684211
GBP2	SEMA4F	-0.715789473684211								GBP2	SEMA4F	-0.715789473684211
GBP2	SGK3	-0.715789473684211								GBP2	SGK3	-0.715789473684211
GBP2	SPOP	-0.715789473684211								GBP2	SPOP	-0.715789473684211
GBP2	ZNF32	-0.715789473684211								GBP2	ZNF32	-0.715789473684211
CD40LG	F2RL1	-0.717543859649123								CD40LG	F2RL1	-0.717543859649123
GBP2	LOC400027	-0.717543859649123								GBP2	LOC400027	-0.717543859649123
CD40LG	NOTCH1	-0.717543859649123								CD40LG	NOTCH1	-0.717543859649123
GBP2	SEC22C	-0.717543859649123								GBP2	SEC22C	-0.717543859649123
GBP2	SFI1	-0.717543859649123								GBP2	SFI1	-0.717543859649123
GBP2	SFRS12	-0.717543859649123								GBP2	SFRS12	-0.717543859649123
GBP2	TMEM55B	-0.717543859649123								GBP2	TMEM55B	-0.717543859649123
GBP2	MGAT2	-0.719298245614035								GBP2	MGAT2	-0.719298245614035
GBP2	PDCD4	-0.719298245614035								GBP2	PDCD4	-0.719298245614035
CD40LG	PICALM	-0.719298245614035								CD40LG	PICALM	-0.719298245614035
GBP2	PIK3R4	-0.719298245614035								GBP2	PIK3R4	-0.719298245614035
GBP2	PRDM4	-0.719298245614035								GBP2	PRDM4	-0.719298245614035
GBP2	SFRS2	-0.719298245614035								GBP2	SFRS2	-0.719298245614035
GBP2	GNE	-0.721052631578947								GBP2	GNE	-0.721052631578947
GBP2	PECI	-0.721052631578947								GBP2	PECI	-0.721052631578947
GBP2	POLA1	-0.721052631578947								GBP2	POLA1	-0.721052631578947
GBP2	RAD17	-0.721052631578947								GBP2	RAD17	-0.721052631578947
CD40LG	ROPN1L	-0.721052631578947								CD40LG	ROPN1L	-0.721052631578947
GBP2	SFRS7	-0.721052631578947								GBP2	SFRS7	-0.721052631578947
GBP2	USP16	-0.721052631578947								GBP2	USP16	-0.721052631578947
GBP2	ZBTB5	-0.721052631578947								GBP2	ZBTB5	-0.721052631578947
CD40LG	GABARAPL2	-0.72280701754386								CD40LG	GABARAPL2	-0.72280701754386
GBP2	NISCH	-0.72280701754386								GBP2	NISCH	-0.72280701754386
CD40LG	PLAUR	-0.72280701754386								CD40LG	PLAUR	-0.72280701754386
GBP2	PPP2R4	-0.72280701754386								GBP2	PPP2R4	-0.72280701754386
CD40LG	SLC15A4	-0.72280701754386								CD40LG	SLC15A4	-0.72280701754386
GBP2	TBC1D24	-0.72280701754386								GBP2	TBC1D24	-0.72280701754386
GBP2	TP53I13	-0.72280701754386								GBP2	TP53I13	-0.72280701754386
GBP2	MRPS31	-0.724561403508772								GBP2	MRPS31	-0.724561403508772
GBP2	RABL2B	-0.724561403508772								GBP2	RABL2B	-0.724561403508772
GBP2	RALGPS1	-0.724561403508772								GBP2	RALGPS1	-0.724561403508772
GBP2	SRRM1	-0.724561403508772								GBP2	SRRM1	-0.724561403508772
GBP2	SYTL2	-0.724561403508772								GBP2	SYTL2	-0.724561403508772
GBP2	IL7	-0.726315789473684								GBP2	IL7	-0.726315789473684
GBP2	OSGEPL1	-0.726315789473684								GBP2	OSGEPL1	-0.726315789473684
CD40LG	PTPRE	-0.726315789473684								CD40LG	PTPRE	-0.726315789473684
GBP2	XYLT2	-0.726315789473684								GBP2	XYLT2	-0.726315789473684
CD40LG	IL8RA	-0.728070175438597								CD40LG	IL8RA	-0.728070175438597
GBP2	KHDRBS1	-0.728070175438597								GBP2	KHDRBS1	-0.728070175438597
GBP2	LAMA5	-0.728070175438597								GBP2	LAMA5	-0.728070175438597
GBP2	NUDT9	-0.728070175438597								GBP2	NUDT9	-0.728070175438597
GBP2	POLS	-0.728070175438597								GBP2	POLS	-0.728070175438597
CD40LG	CEBPB	-0.729824561403509								CD40LG	CEBPB	-0.729824561403509
GBP2	NGDN	-0.729824561403509								GBP2	NGDN	-0.729824561403509
GBP2	SFRS8	-0.729824561403509								GBP2	SFRS8	-0.729824561403509
CD40LG	STEAP4	-0.729824561403509								CD40LG	STEAP4	-0.729824561403509
GBP2	TFB1M	-0.729824561403509								GBP2	TFB1M	-0.729824561403509
CD40LG	TGFA	-0.729824561403509								CD40LG	TGFA	-0.729824561403509
GBP2	LRRC14	-0.731578947368421								GBP2	LRRC14	-0.731578947368421
CD40LG	PPP3CA	-0.731578947368421								CD40LG	PPP3CA	-0.731578947368421
CD40LG	SLC22A15	-0.731578947368421								CD40LG	SLC22A15	-0.731578947368421
CD40LG	SLC45A4	-0.731578947368421								CD40LG	SLC45A4	-0.731578947368421
GBP2	TH1L	-0.731578947368421								GBP2	TH1L	-0.731578947368421
GBP2	WDR43	-0.731578947368421								GBP2	WDR43	-0.731578947368421
GBP2	ZADH2	-0.731578947368421								GBP2	ZADH2	-0.731578947368421
CD40LG	CD58	-0.733333333333333								CD40LG	CD58	-0.733333333333333
CD40LG	MAP2K4	-0.733333333333333								CD40LG	MAP2K4	-0.733333333333333
GBP2	RAD54B	-0.733333333333333								GBP2	RAD54B	-0.733333333333333
CD40LG	STX7	-0.733333333333333								CD40LG	STX7	-0.733333333333333
CD40LG	TREM1	-0.733333333333333								CD40LG	TREM1	-0.733333333333333
GBP2	YTHDF1	-0.733333333333333								GBP2	YTHDF1	-0.733333333333333
CD40LG	CEBPD	-0.735087719298246								CD40LG	CEBPD	-0.735087719298246
GBP2	GTF3C3	-0.735087719298246								GBP2	GTF3C3	-0.735087719298246
GBP2	KIAA1147	-0.735087719298246								GBP2	KIAA1147	-0.735087719298246
GBP2	LACTB2	-0.735087719298246								GBP2	LACTB2	-0.735087719298246
GBP2	LEAP2	-0.735087719298246								GBP2	LEAP2	-0.735087719298246
GBP2	NDFIP2	-0.735087719298246								GBP2	NDFIP2	-0.735087719298246
CD40LG	NUMB	-0.735087719298246								CD40LG	NUMB	-0.735087719298246
GBP2	RAB3GAP1	-0.735087719298246								GBP2	RAB3GAP1	-0.735087719298246
GBP2	SUV39H1	-0.735087719298246								GBP2	SUV39H1	-0.735087719298246
GBP2	VEZT	-0.735087719298246								GBP2	VEZT	-0.735087719298246
CD40LG	XPO6	-0.735087719298246								CD40LG	XPO6	-0.735087719298246
CD40LG	DDIT3	-0.736842105263158								CD40LG	DDIT3	-0.736842105263158
CD40LG	DNAH5	-0.736842105263158								CD40LG	DNAH5	-0.736842105263158
GBP2	MPHOSPH10	-0.736842105263158								GBP2	MPHOSPH10	-0.736842105263158
GBP2	ORAOV1	-0.736842105263158								GBP2	ORAOV1	-0.736842105263158
GBP2	SCOC	-0.736842105263158								GBP2	SCOC	-0.736842105263158
CD40LG	SLC44A2	-0.736842105263158								CD40LG	SLC44A2	-0.736842105263158
CD40LG	TLR4	-0.736842105263158								CD40LG	TLR4	-0.736842105263158
GBP2	ZMYND11	-0.736842105263158								GBP2	ZMYND11	-0.736842105263158
GBP2	ZNF689	-0.736842105263158								GBP2	ZNF689	-0.736842105263158
GBP2	HNRPDL	-0.73859649122807								GBP2	HNRPDL	-0.73859649122807
GBP2	LIN7B	-0.73859649122807								GBP2	LIN7B	-0.73859649122807
GBP2	NARG1L	-0.73859649122807								GBP2	NARG1L	-0.73859649122807
CD40LG	NEDD9	-0.73859649122807								CD40LG	NEDD9	-0.73859649122807
GBP2	RPP38	-0.73859649122807								GBP2	RPP38	-0.73859649122807
CD40LG	SELL	-0.73859649122807								CD40LG	SELL	-0.73859649122807
GBP2	TTC17	-0.73859649122807								GBP2	TTC17	-0.73859649122807
CD40LG	VNN3	-0.73859649122807								CD40LG	VNN3	-0.73859649122807
GBP2	ZNF12	-0.73859649122807								GBP2	ZNF12	-0.73859649122807
GBP2	ZNF275	-0.73859649122807								GBP2	ZNF275	-0.73859649122807
CD40LG	GSK3B	-0.740350877192982								CD40LG	GSK3B	-0.740350877192982
GBP2	PNN	-0.740350877192982								GBP2	PNN	-0.740350877192982
CD40LG	RASSF2	-0.740350877192982								CD40LG	RASSF2	-0.740350877192982
GBP2	SLC25A17	-0.740350877192982								GBP2	SLC25A17	-0.740350877192982
GBP2	KLHDC3	-0.742105263157895								GBP2	KLHDC3	-0.742105263157895
GBP2	LIAS	-0.742105263157895								GBP2	LIAS	-0.742105263157895
CD40LG	LRMP	-0.742105263157895								CD40LG	LRMP	-0.742105263157895
GBP2	MTA1	-0.742105263157895								GBP2	MTA1	-0.742105263157895
GBP2	PAPD5	-0.742105263157895								GBP2	PAPD5	-0.742105263157895
GBP2	GOLGA3	-0.743859649122807								GBP2	GOLGA3	-0.743859649122807
GBP2	RFC1	-0.743859649122807								GBP2	RFC1	-0.743859649122807
CD40LG	SKAP2	-0.743859649122807								CD40LG	SKAP2	-0.743859649122807
CD40LG	SRPK1	-0.743859649122807								CD40LG	SRPK1	-0.743859649122807
CD40LG	TGM3	-0.743859649122807								CD40LG	TGM3	-0.743859649122807
CD40LG	TMEM49	-0.743859649122807								CD40LG	TMEM49	-0.743859649122807
GBP2	HOOK1	-0.745614035087719								GBP2	HOOK1	-0.745614035087719
GBP2	NOL8	-0.745614035087719								GBP2	NOL8	-0.745614035087719
GBP2	NSUN4	-0.745614035087719								GBP2	NSUN4	-0.745614035087719
GBP2	VPS52	-0.745614035087719								GBP2	VPS52	-0.745614035087719
CD40LG	DGAT2	-0.747368421052632								CD40LG	DGAT2	-0.747368421052632
CD40LG	DPEP3	-0.747368421052632								CD40LG	DPEP3	-0.747368421052632
GBP2	MTF2	-0.747368421052632								GBP2	MTF2	-0.747368421052632
GBP2	PIN4	-0.747368421052632								GBP2	PIN4	-0.747368421052632
GBP2	PMS2L5	-0.747368421052632								GBP2	PMS2L5	-0.747368421052632
GBP2	SLC25A4	-0.747368421052632								GBP2	SLC25A4	-0.747368421052632
CD40LG	CEP63	-0.749122807017544								CD40LG	CEP63	-0.749122807017544
CD40LG	IL1RN	-0.749122807017544								CD40LG	IL1RN	-0.749122807017544
GBP2	LANCL1	-0.749122807017544								GBP2	LANCL1	-0.749122807017544
GBP2	LSS	-0.749122807017544								GBP2	LSS	-0.749122807017544
GBP2	MAGED1	-0.749122807017544								GBP2	MAGED1	-0.749122807017544
CD40LG	PDLIM7	-0.749122807017544								CD40LG	PDLIM7	-0.749122807017544
GBP2	RARS	-0.749122807017544								GBP2	RARS	-0.749122807017544
GBP2	RYK	-0.749122807017544								GBP2	RYK	-0.749122807017544
GBP2	SESN1	-0.749122807017544								GBP2	SESN1	-0.749122807017544
GBP2	SNRPA1	-0.749122807017544								GBP2	SNRPA1	-0.749122807017544
GBP2	UCKL1	-0.749122807017544								GBP2	UCKL1	-0.749122807017544
GBP2	UST	-0.749122807017544								GBP2	UST	-0.749122807017544
GBP2	WDR75	-0.749122807017544								GBP2	WDR75	-0.749122807017544
CD40LG	CKAP4	-0.750877192982456								CD40LG	CKAP4	-0.750877192982456
CD40LG	CPD	-0.750877192982456								CD40LG	CPD	-0.750877192982456
CD40LG	DYSF	-0.750877192982456								CD40LG	DYSF	-0.750877192982456
CD40LG	FAM45A	-0.750877192982456								CD40LG	FAM45A	-0.750877192982456
GBP2	PER2	-0.750877192982456								GBP2	PER2	-0.750877192982456
GBP2	REV1	-0.750877192982456								GBP2	REV1	-0.750877192982456
GBP2	ZNF160	-0.750877192982456								GBP2	ZNF160	-0.750877192982456
CD40LG	DNAJC3	-0.752631578947368								CD40LG	DNAJC3	-0.752631578947368
CD40LG	H3F3A	-0.752631578947368								CD40LG	H3F3A	-0.752631578947368
CD40LG	LRG1	-0.752631578947368								CD40LG	LRG1	-0.752631578947368
CD40LG	PLCG2	-0.752631578947368								CD40LG	PLCG2	-0.752631578947368
GBP2	PTBP2	-0.752631578947368								GBP2	PTBP2	-0.752631578947368
CD40LG	RFWD2	-0.752631578947368								CD40LG	RFWD2	-0.752631578947368
GBP2	RNF126	-0.752631578947368								GBP2	RNF126	-0.752631578947368
GBP2	THOC1	-0.752631578947368								GBP2	THOC1	-0.752631578947368
GBP2	UBE3A	-0.752631578947368								GBP2	UBE3A	-0.752631578947368
CD40LG	VPS37C	-0.752631578947368								CD40LG	VPS37C	-0.752631578947368
CD40LG	MCL1	-0.754385964912281								CD40LG	MCL1	-0.754385964912281
GBP2	MTMR9	-0.754385964912281								GBP2	MTMR9	-0.754385964912281
GBP2	NUAK1	-0.754385964912281								GBP2	NUAK1	-0.754385964912281
GBP2	SF3A3	-0.754385964912281								GBP2	SF3A3	-0.754385964912281
GBP2	SH2B1	-0.754385964912281								GBP2	SH2B1	-0.754385964912281
GBP2	TULP4	-0.754385964912281								GBP2	TULP4	-0.754385964912281
CD40LG	WAS	-0.754385964912281								CD40LG	WAS	-0.754385964912281
CD40LG	FOS	-0.756140350877193								CD40LG	FOS	-0.756140350877193
GBP2	HERC2	-0.756140350877193								GBP2	HERC2	-0.756140350877193
GBP2	POFUT2	-0.756140350877193								GBP2	POFUT2	-0.756140350877193
GBP2	ZBTB25	-0.756140350877193								GBP2	ZBTB25	-0.756140350877193
CD40LG	FCGR2A	-0.757894736842105								CD40LG	FCGR2A	-0.757894736842105
CD40LG	MEGF9	-0.757894736842105								CD40LG	MEGF9	-0.757894736842105
GBP2	THUMPD1	-0.757894736842105								GBP2	THUMPD1	-0.757894736842105
CD40LG	MGAM	-0.759649122807018								CD40LG	MGAM	-0.759649122807018
GBP2	NPAT	-0.759649122807018								GBP2	NPAT	-0.759649122807018
CD40LG	PELI1	-0.759649122807018								CD40LG	PELI1	-0.759649122807018
GBP2	RAB11FIP2	-0.759649122807018								GBP2	RAB11FIP2	-0.759649122807018
CD40LG	TRIB1	-0.759649122807018								CD40LG	TRIB1	-0.759649122807018
GBP2	WDR48	-0.759649122807018								GBP2	WDR48	-0.759649122807018
GBP2	ZNF395	-0.759649122807018								GBP2	ZNF395	-0.759649122807018
GBP2	ZNF45	-0.759649122807018								GBP2	ZNF45	-0.759649122807018
CD40LG	EIF2C4	-0.76140350877193								CD40LG	EIF2C4	-0.76140350877193
GBP2	GRPEL2	-0.76140350877193								GBP2	GRPEL2	-0.76140350877193
GBP2	OSBPL10	-0.76140350877193								GBP2	OSBPL10	-0.76140350877193
CD40LG	PILRA	-0.76140350877193								CD40LG	PILRA	-0.76140350877193
CD40LG	CHMP1B	-0.763157894736842								CD40LG	CHMP1B	-0.763157894736842
CD40LG	IL13RA1	-0.763157894736842								CD40LG	IL13RA1	-0.763157894736842
GBP2	LRIG2	-0.763157894736842								GBP2	LRIG2	-0.763157894736842
GBP2	RFX5	-0.763157894736842								GBP2	RFX5	-0.763157894736842
GBP2	TGFBRAP1	-0.763157894736842								GBP2	TGFBRAP1	-0.763157894736842
GBP2	VPS13A	-0.763157894736842								GBP2	VPS13A	-0.763157894736842
GBP2	HIST1H4C	-0.764912280701754								GBP2	HIST1H4C	-0.764912280701754
CD40LG	IRS2	-0.764912280701754								CD40LG	IRS2	-0.764912280701754
CD40LG	SLC2A3	-0.764912280701754								CD40LG	SLC2A3	-0.764912280701754
GBP2	TARDBP	-0.764912280701754								GBP2	TARDBP	-0.764912280701754
GBP2	TRDMT1	-0.764912280701754								GBP2	TRDMT1	-0.764912280701754
CD40LG	ZNF516	-0.764912280701754								CD40LG	ZNF516	-0.764912280701754
CD40LG	IFNGR2	-0.766666666666667								CD40LG	IFNGR2	-0.766666666666667
CD40LG	NINJ1	-0.766666666666667								CD40LG	NINJ1	-0.766666666666667
GBP2	RBM17	-0.766666666666667								GBP2	RBM17	-0.766666666666667
CD40LG	CMTM6	-0.768421052631579								CD40LG	CMTM6	-0.768421052631579
GBP2	IARS	-0.768421052631579								GBP2	IARS	-0.768421052631579
GBP2	PDHX	-0.768421052631579								GBP2	PDHX	-0.768421052631579
CD40LG	RTN3	-0.768421052631579								CD40LG	RTN3	-0.768421052631579
CD40LG	HCK	-0.770175438596491								CD40LG	HCK	-0.770175438596491
CD40LG	LRRK2	-0.770175438596491								CD40LG	LRRK2	-0.770175438596491
CD40LG	TACC3	-0.770175438596491								CD40LG	TACC3	-0.770175438596491
CD40LG	ZDHHC18	-0.770175438596491								CD40LG	ZDHHC18	-0.770175438596491
GBP2	MLLT6	-0.771929824561403								GBP2	MLLT6	-0.771929824561403
GBP2	RNF157	-0.771929824561403								GBP2	RNF157	-0.771929824561403
CD40LG	ULK1	-0.771929824561403								CD40LG	ULK1	-0.771929824561403
CD40LG	IFRD1	-0.775438596491228								CD40LG	IFRD1	-0.775438596491228
CD40LG	IMPA2	-0.775438596491228								CD40LG	IMPA2	-0.775438596491228
GBP2	SUPV3L1	-0.775438596491228								GBP2	SUPV3L1	-0.775438596491228
CD40LG	TIMP2	-0.775438596491228								CD40LG	TIMP2	-0.775438596491228
GBP2	WDR59	-0.775438596491228								GBP2	WDR59	-0.775438596491228
GBP2	ZNF263	-0.775438596491228								GBP2	ZNF263	-0.775438596491228
CD40LG	LAMP2	-0.77719298245614								CD40LG	LAMP2	-0.77719298245614
CD40LG	LIN7A	-0.77719298245614								CD40LG	LIN7A	-0.77719298245614
GBP2	MGC27345	-0.77719298245614								GBP2	MGC27345	-0.77719298245614
GBP2	OSBPL7	-0.77719298245614								GBP2	OSBPL7	-0.77719298245614
CD40LG	PANX2	-0.77719298245614								CD40LG	PANX2	-0.77719298245614
CD40LG	TMEM71	-0.77719298245614								CD40LG	TMEM71	-0.77719298245614
CD40LG	CYP26A1	-0.778947368421053								CD40LG	CYP26A1	-0.778947368421053
GBP2	GTPBP8	-0.778947368421053								GBP2	GTPBP8	-0.778947368421053
GBP2	OPA3	-0.778947368421053								GBP2	OPA3	-0.778947368421053
CD40LG	S100A12	-0.778947368421053								CD40LG	S100A12	-0.778947368421053
GBP2	SCFD1	-0.778947368421053								GBP2	SCFD1	-0.778947368421053
CD40LG	SNX10	-0.778947368421053								CD40LG	SNX10	-0.778947368421053
GBP2	ZNF562	-0.778947368421053								GBP2	ZNF562	-0.778947368421053
CD40LG	OSBPL11	-0.780701754385965								CD40LG	OSBPL11	-0.780701754385965
CD40LG	SLA	-0.780701754385965								CD40LG	SLA	-0.780701754385965
GBP2	SYVN1	-0.780701754385965								GBP2	SYVN1	-0.780701754385965
CD40LG	MOSC1	-0.782456140350877								CD40LG	MOSC1	-0.782456140350877
GBP2	NUP85	-0.782456140350877								GBP2	NUP85	-0.782456140350877
CD40LG	FAM49B	-0.784210526315789								CD40LG	FAM49B	-0.784210526315789
GBP2	RING1	-0.784210526315789								GBP2	RING1	-0.784210526315789
GBP2	RORA	-0.784210526315789								GBP2	RORA	-0.784210526315789
CD40LG	HAL	-0.785964912280702								CD40LG	HAL	-0.785964912280702
GBP2	KIAA0748	-0.785964912280702								GBP2	KIAA0748	-0.785964912280702
CD40LG	PTEN	-0.785964912280702								CD40LG	PTEN	-0.785964912280702
GBP2	RPS18	-0.785964912280702								GBP2	RPS18	-0.785964912280702
GBP2	WDR73	-0.785964912280702								GBP2	WDR73	-0.785964912280702
GBP2	MTAP	-0.787719298245614								GBP2	MTAP	-0.787719298245614
GBP2	POLR2H	-0.787719298245614								GBP2	POLR2H	-0.787719298245614
GBP2	SCRIB	-0.787719298245614								GBP2	SCRIB	-0.787719298245614
GBP2	SFRS15	-0.787719298245614								GBP2	SFRS15	-0.787719298245614
GBP2	TMEM5	-0.787719298245614								GBP2	TMEM5	-0.787719298245614
GBP2	ZNF329	-0.787719298245614								GBP2	ZNF329	-0.787719298245614
CD40LG	CREB5	-0.789473684210526								CD40LG	CREB5	-0.789473684210526
CD40LG	LYST	-0.789473684210526								CD40LG	LYST	-0.789473684210526
GBP2	RNASEH1	-0.789473684210526								GBP2	RNASEH1	-0.789473684210526
CD40LG	RRAGD	-0.789473684210526								CD40LG	RRAGD	-0.789473684210526
GBP2	TAF2	-0.789473684210526								GBP2	TAF2	-0.789473684210526
GBP2	TEAD2	-0.789473684210526								GBP2	TEAD2	-0.789473684210526
GBP2	USP14	-0.789473684210526								GBP2	USP14	-0.789473684210526
CD40LG	CLEC7A	-0.791228070175439								CD40LG	CLEC7A	-0.791228070175439
GBP2	GPAM	-0.791228070175439								GBP2	GPAM	-0.791228070175439
CD40LG	TMEM55A	-0.791228070175439								CD40LG	TMEM55A	-0.791228070175439
CD40LG	HECW2	-0.792982456140351								CD40LG	HECW2	-0.792982456140351
GBP2	NPIP	-0.792982456140351								GBP2	NPIP	-0.792982456140351
GBP2	RABGAP1	-0.792982456140351								GBP2	RABGAP1	-0.792982456140351
CD40LG	TMEM88	-0.792982456140351								CD40LG	TMEM88	-0.792982456140351
GBP2	HSCB	-0.794736842105263								GBP2	HSCB	-0.794736842105263
GBP2	SMARCC2	-0.794736842105263								GBP2	SMARCC2	-0.794736842105263
CD40LG	SRGN	-0.794736842105263								CD40LG	SRGN	-0.794736842105263
GBP2	TRAM2	-0.794736842105263								GBP2	TRAM2	-0.794736842105263
CD40LG	IL1R2	-0.796491228070175								CD40LG	IL1R2	-0.796491228070175
CD40LG	RNF24	-0.796491228070175								CD40LG	RNF24	-0.796491228070175
GBP2	TOE1	-0.798245614035088								GBP2	TOE1	-0.798245614035088
GBP2	UBE2G2	-0.798245614035088								GBP2	UBE2G2	-0.798245614035088
GBP2	ITPR3	-0.8								GBP2	ITPR3	-0.8
CD40LG	TMBIM4	-0.8								CD40LG	TMBIM4	-0.8
CD40LG	ITM2B	-0.803508771929825								CD40LG	ITM2B	-0.803508771929825
CD40LG	TMEM154	-0.803508771929825								CD40LG	TMEM154	-0.803508771929825
CD40LG	GCA	-0.805263157894737								CD40LG	GCA	-0.805263157894737
CD40LG	NUP214	-0.805263157894737								CD40LG	NUP214	-0.805263157894737
CD40LG	RAB11FIP1	-0.805263157894737								CD40LG	RAB11FIP1	-0.805263157894737
CD40LG	SEPX1	-0.805263157894737								CD40LG	SEPX1	-0.805263157894737
CD40LG	CDA	-0.807017543859649								CD40LG	CDA	-0.807017543859649
CD40LG	EVI2A	-0.807017543859649								CD40LG	EVI2A	-0.807017543859649
GBP2	GTPBP3	-0.807017543859649								GBP2	GTPBP3	-0.807017543859649
GBP2	KLF9	-0.807017543859649								GBP2	KLF9	-0.807017543859649
CD40LG	MOSPD2	-0.808771929824561								CD40LG	MOSPD2	-0.808771929824561
CD40LG	CXCL6	-0.810526315789474								CD40LG	CXCL6	-0.810526315789474
GBP2	PUS1	-0.810526315789474								GBP2	PUS1	-0.810526315789474
CD40LG	TPD52L2	-0.812280701754386								CD40LG	TPD52L2	-0.812280701754386
CD40LG	CSF3R	-0.814035087719298								CD40LG	CSF3R	-0.814035087719298
GBP2	PCYOX1	-0.814035087719298								GBP2	PCYOX1	-0.814035087719298
CD40LG	PISD	-0.814035087719298								CD40LG	PISD	-0.814035087719298
CD40LG	PROK2	-0.814035087719298								CD40LG	PROK2	-0.814035087719298
CD40LG	RBP7	-0.814035087719298								CD40LG	RBP7	-0.814035087719298
CD40LG	NPL	-0.815789473684211								CD40LG	NPL	-0.815789473684211
GBP2	PAQR8	-0.815789473684211								GBP2	PAQR8	-0.815789473684211
CD40LG	SDCBP	-0.815789473684211								CD40LG	SDCBP	-0.815789473684211
CD40LG	KLHL2	-0.817543859649123								CD40LG	KLHL2	-0.817543859649123
CD40LG	LILRA5	-0.817543859649123								CD40LG	LILRA5	-0.817543859649123
CD40LG	MAPK3	-0.819298245614035								CD40LG	MAPK3	-0.819298245614035
CD40LG	MMP25	-0.819298245614035								CD40LG	MMP25	-0.819298245614035
GBP2	PLEKHA1	-0.821052631578947								GBP2	PLEKHA1	-0.821052631578947
CD40LG	SVIL	-0.82280701754386								CD40LG	SVIL	-0.82280701754386
CD40LG	TPST1	-0.82280701754386								CD40LG	TPST1	-0.82280701754386
GBP2	GFPT1	-0.824561403508772								GBP2	GFPT1	-0.824561403508772
GBP2	KIAA1279	-0.824561403508772								GBP2	KIAA1279	-0.824561403508772
CD40LG	QPCT	-0.824561403508772								CD40LG	QPCT	-0.824561403508772
CD40LG	FAM53C	-0.826315789473684								CD40LG	FAM53C	-0.826315789473684
CD40LG	SLC6A6	-0.826315789473684								CD40LG	SLC6A6	-0.826315789473684
CD40LG	EVI2B	-0.828070175438597								CD40LG	EVI2B	-0.828070175438597
CD40LG	HEBP2	-0.829824561403509								CD40LG	HEBP2	-0.829824561403509
CD40LG	P2RY13	-0.829824561403509								CD40LG	P2RY13	-0.829824561403509
CD40LG	RAF1	-0.829824561403509								CD40LG	RAF1	-0.829824561403509
CD40LG	MMP9	-0.831578947368421								CD40LG	MMP9	-0.831578947368421
GBP2	ZNF576	-0.831578947368421								GBP2	ZNF576	-0.831578947368421
GBP2	UHRF2	-0.833333333333333								GBP2	UHRF2	-0.833333333333333
CD40LG	S100A11	-0.835087719298246								CD40LG	S100A11	-0.835087719298246
CD40LG	UBN1	-0.835087719298246								CD40LG	UBN1	-0.835087719298246
CD40LG	ICAM3	-0.836842105263158								CD40LG	ICAM3	-0.836842105263158
CD40LG	IGF2R	-0.83859649122807								CD40LG	IGF2R	-0.83859649122807
GBP2	SERTAD2	-0.840350877192982								GBP2	SERTAD2	-0.840350877192982
CD40LG	NDEL1	-0.842105263157895								CD40LG	NDEL1	-0.842105263157895
CD40LG	SULT1B1	-0.843859649122807								CD40LG	SULT1B1	-0.843859649122807
GBP2	MYCBP2	-0.845614035087719								GBP2	MYCBP2	-0.845614035087719
CD40LG	FRAT2	-0.847368421052632								CD40LG	FRAT2	-0.847368421052632
CD40LG	PGLYRP1	-0.847368421052632								CD40LG	PGLYRP1	-0.847368421052632
CD40LG	NHS	-0.849122807017544								CD40LG	NHS	-0.849122807017544
CD40LG	ZNF467	-0.849122807017544								CD40LG	ZNF467	-0.849122807017544
CD40LG	LAT2	-0.850877192982456								CD40LG	LAT2	-0.850877192982456
GBP2	PUM1	-0.852631578947368								GBP2	PUM1	-0.852631578947368
CD40LG	E2F3	-0.856140350877193								CD40LG	E2F3	-0.856140350877193
CD40LG	NFIL3	-0.856140350877193								CD40LG	NFIL3	-0.856140350877193
GBP2	TNPO2	-0.856140350877193								GBP2	TNPO2	-0.856140350877193
CD40LG	MME	-0.859649122807018								CD40LG	MME	-0.859649122807018
CD40LG	REPS2	-0.859649122807018								CD40LG	REPS2	-0.859649122807018
CD40LG	ZYX	-0.859649122807018								CD40LG	ZYX	-0.859649122807018
CD40LG	PELI2	-0.86140350877193								CD40LG	PELI2	-0.86140350877193
CD40LG	USP10	-0.86140350877193								CD40LG	USP10	-0.86140350877193
CD40LG	TBL1X	-0.863157894736842								CD40LG	TBL1X	-0.863157894736842
CD40LG	CMTM2	-0.866666666666667								CD40LG	CMTM2	-0.866666666666667
CD40LG	DNTTIP1	-0.866666666666667								CD40LG	DNTTIP1	-0.866666666666667
CD40LG	IL10RB	-0.868421052631579								CD40LG	IL10RB	-0.868421052631579
GBP2	SAMD1	-0.870175438596491								GBP2	SAMD1	-0.870175438596491
CD40LG	MANSC1	-0.871929824561404								CD40LG	MANSC1	-0.871929824561404
CD40LG	MXD1	-0.871929824561404								CD40LG	MXD1	-0.871929824561404
CD40LG	TM6SF1	-0.871929824561404								CD40LG	TM6SF1	-0.871929824561404
CD40LG	CHIC2	-0.873684210526316								CD40LG	CHIC2	-0.873684210526316
CD40LG	CYP4F3	-0.87719298245614								CD40LG	CYP4F3	-0.87719298245614
GBP2	KIAA0355	-0.882456140350877								GBP2	KIAA0355	-0.882456140350877
CD40LG	NCOA1	-0.882456140350877								CD40LG	NCOA1	-0.882456140350877
CD40LG	TALDO1	-0.884210526315789								CD40LG	TALDO1	-0.884210526315789
CD40LG	PADI4	-0.891228070175439								CD40LG	PADI4	-0.891228070175439
CD40LG	CD55	-0.903508771929825								CD40LG	CD55	-0.903508771929825
CD40LG	GAB2	-0.914035087719298								CD40LG	GAB2	-0.914035087719298
CD40LG	RGS2	-0.91578947368421								CD40LG	RGS2	-0.91578947368421
